# Supplementary material for: A novel TanCAR targeting IL13Rα2 and EphA2 for enhanced glioblastoma therapy
Source: PubMed Central journal article supplement — Mol Ther Oncolytics. 2022 Feb 20;24:729–41. doi: 10.1016/j.omto.2022.02.012 (PMC8908045; doi:10.1016/j.omto.2022.02.012), 2022-02-20
Supplement: mmc1.pdf [file mmc1.pdf]

**Supplemental information**

**A novel TanCAR targeting IL13R $\alpha$ 2 and EphA2  
for enhanced glioblastoma therapy**

**Niaz Muhammad, Rong Wang, Wenyan Li, Zihan Zhang, Yongxing Chang, Yitao Hu, Junli Zhao, Xiaojing Zheng, Qinwen Mao, and Haibin Xia**

Supplemental Information

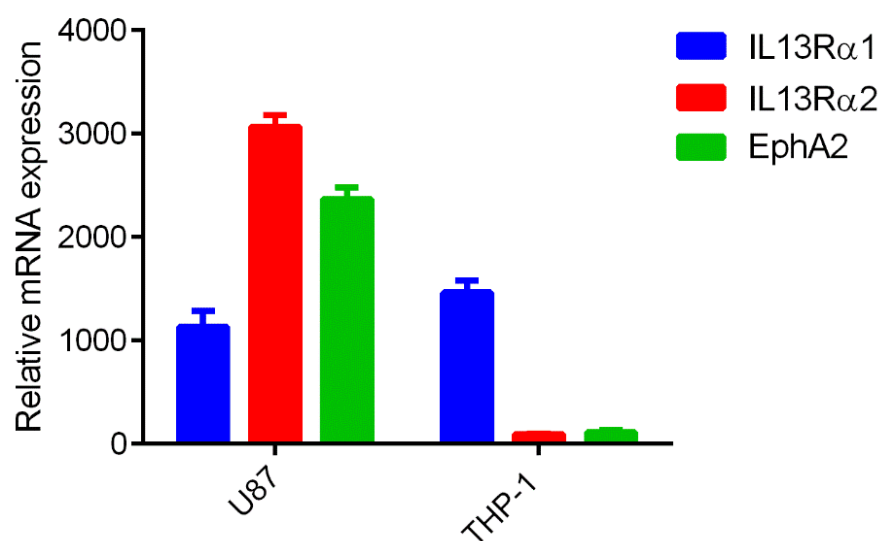

**Figure S1.** The relative mRNA expression level of EphA2, IL13R $\alpha$ 1, and IL13R $\alpha$ 2 genes in U87 and THP-1 cell lines.

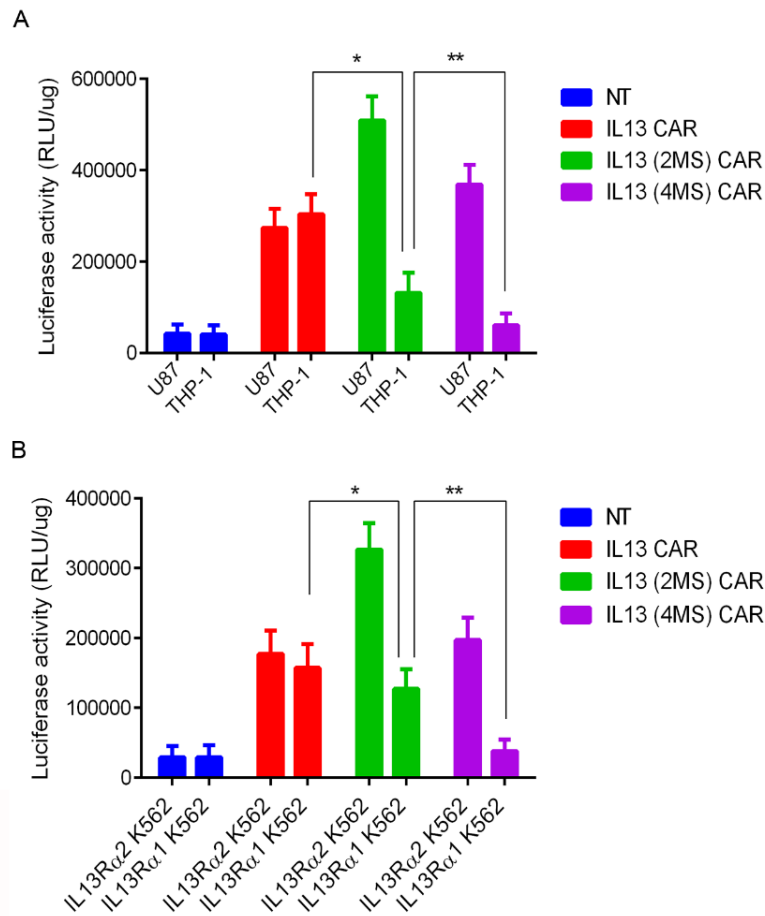

**Figure S2. Functional characterization of the novel IL13 CAR in Jurkat T cells.** (A) Non-transduced (NT) Jurkat T cells, IL13 Jurkat CAR-T cells, IL13 (2MS) Jurkat CAR-T cells, and IL13 (4MS) Jurkat CAR-T cells were co-cultured with U87 cells or THP-1 cells at an effector to target (E:T) ratio of  $1 \times 10^5:1 \times 10^5$ , and after 24 hours, luciferase activity was measured using a luciferase reporter assay kit. (B) NT Jurkat T cells, IL13 Jurkat CAR-T cells, IL13 (E13K.R109K) Jurkat CAR-T cells, and IL13 (4MS) Jurkat CAR-T cells were co-cultured with IL13Rα2- or IL13Rα1-engineered K562 target cells at an E:T ratio of  $1 \times 10^5:1 \times 10^5$ , and after 24 hours, luciferase activity was measured using a luciferase reporter assay kit and a Varioskan Flash multitechnology microplate reader. Statistically significant differences are indicated: \*P<0.05; \*\*P<0.01. IL13 (2MS) stands for IL13 (E13K.R109K), while IL13 (4MS) stands for IL13 (E13K.R66D.S69D.R109K).

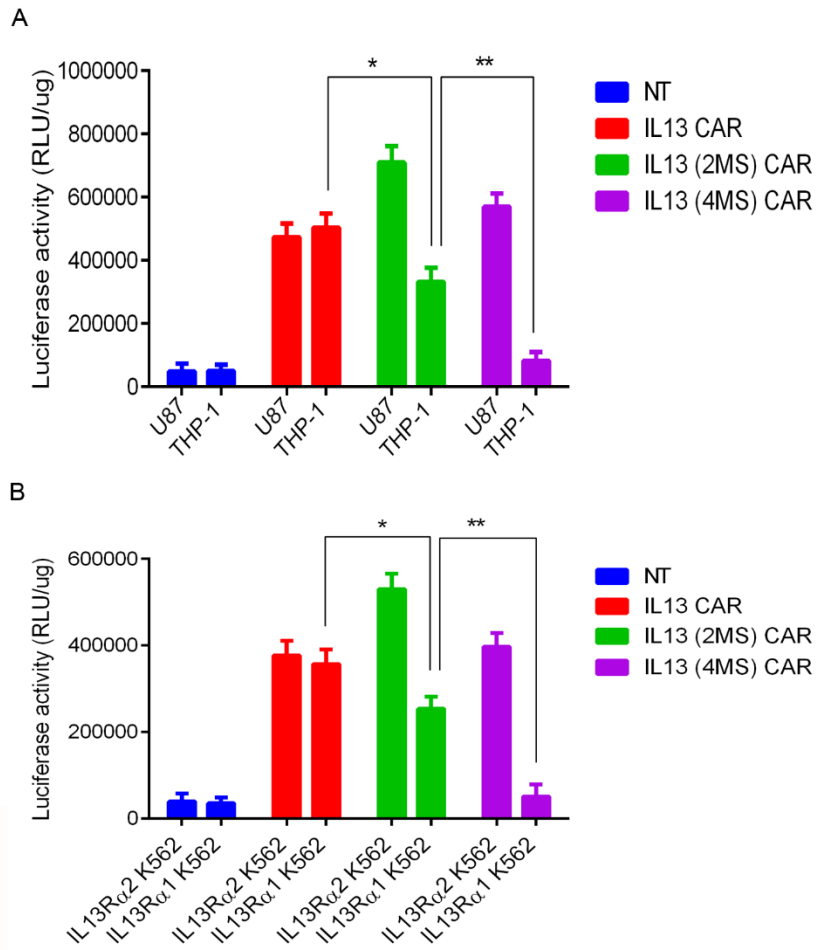

**Figure S3. Functional characterization of the novel IL13 CAR in Jurkat T cells.** (A) Non-transduced (NT) Jurkat T cells, IL13 Jurkat CAR-T cells, IL13 (2MS) Jurkat CAR-T cells, and IL13 (4MS) Jurkat CAR-T cells were co-cultured with U87 cells or THP-1 cells at an effector to target (E:T) ratio of  $1 \times 10^5:1 \times 10^5$ , and after 24 hours, luciferase activity was measured using a luciferase reporter assay kit. (B) NT Jurkat T cells, IL13 Jurkat CAR-T cells, IL13 (E13K.R109K) Jurkat CAR-T cells, and IL13 (4MS) Jurkat CAR-T cells were co-cultured with IL13Ra2- or IL13Ra1-engineered K562 target cells at an E:T ratio of  $1 \times 10^5:1 \times 10^5$ , and after 24 hours, luciferase activity was measured using a luciferase reporter assay kit and a Varioskan Flash multitechnology microplate reader. Statistically significant differences are indicated: \* $P < 0.05$ ; \*\* $P < 0.01$ . IL13 (2MS) stands for IL13 (E13K.R109K), while IL13 (4MS) stands for IL13 (E13K.R66D.S69D.R109K).

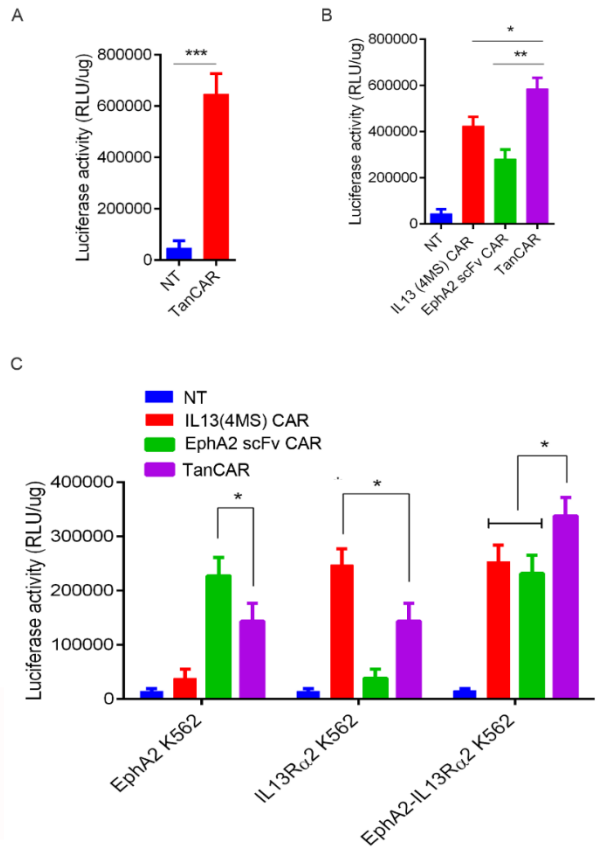

**Figure S4. Functional characterization of the novel bispecific IL13 (4MS)-EphA2 scFv-TanCAR**

**in Jurkat T cells.** (A) NT Jurkat T cells and IL13 (4MS)-EphA2 scFv-TanCAR Jurkat T cells were co-

cultured with U87 cells at an E:T ratio of  $1 \times 10^5:1 \times 10^5$ , and after 24 hours, luciferase activity was

measured using a luciferase reporter assay kit. (B) NT Jurkat T cells, IL13 (4MS) Jurkat CAR T cells,

EphA2 scFv Jurkat CAR T cells, and IL13 (4MS)-EphA2 scFv-TanCAR Jurkat T cells were co-cultured

with U87 cells at an E:T ratio of  $1 \times 10^5:1 \times 10^5$ , and after 24 hours, luciferase activity was measured using

a luciferase reporter assay kit. (C) NT Jurkat T cells, IL13 (4MS) Jurkat CAR T cells, EphA2 scFv Jurkat

CAR T cells, and IL13 (4MS)-EphA2 scFv-TanCAR Jurkat T cells were co-cultured with EphA2-

engineered K562 target cells, IL13Rα2-engineered K562 target cells, or EphA2-IL13Rα2-engineered

K562 target cells individually at an E:T ratio of  $1 \times 10^5:1 \times 10^5$ , and after 24 hours, luciferase activity was

measured using a luciferase reporter assay kit. Statistically significant differences are indicated: \*P<0.05;

\*\*P<0.01; \*\*\* P<0.001. TanCAR stands for IL13 (4MS)-EphA2 scFv-TanCAR.

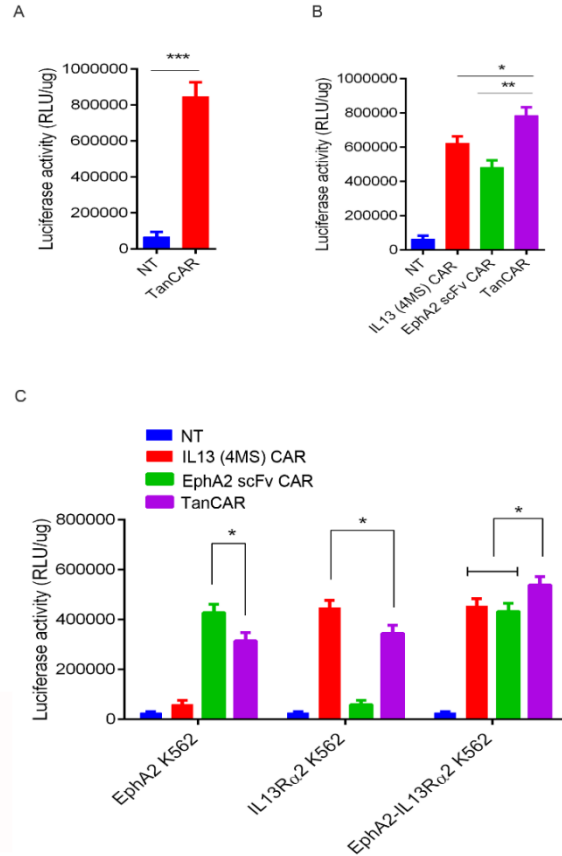

**Figure S5. Functional characterization of the novel bispecific IL13 (4MS)-EphA2 scFv-TanCAR**

**in Jurkat T cells.** (A) NT Jurkat T cells and IL13 (4MS)-EphA2 scFv-TanCAR Jurkat T cells were co-

cultured with U87 cells at an E:T ratio of  $1 \times 10^5:1 \times 10^5$ , and after 24 hours, luciferase activity was

measured using a luciferase reporter assay kit. (B) NT Jurkat T cells, IL13 (4MS) Jurkat CAR T cells,

EphA2 scFv Jurkat CAR T cells, and IL13 (4MS)-EphA2 scFv-TanCAR Jurkat T cells were co-cultured

with U87 cells at an E:T ratio of  $1 \times 10^5:1 \times 10^5$ , and after 24 hours, luciferase activity was measured using

a luciferase reporter assay kit. (C) NT Jurkat T cells, IL13 (4MS) Jurkat CAR T cells, EphA2 scFv Jurkat

CAR T cells, and IL13 (4MS)-EphA2 scFv-TanCAR Jurkat T cells were co-cultured with EphA2-

engineered K562 target cells, IL13Rα2-engineered K562 target cells, or EphA2-IL13Rα2-engineered

K562 target cells individually at an E:T ratio of  $1 \times 10^5:1 \times 10^5$ , and after 24 hours, luciferase activity was

measured using a luciferase reporter assay kit. Statistically significant differences are indicated: \*P<0.05;

\*\*P<0.01; \*\*\* P<0.001. TanCAR stands for IL13 (4MS)-EphA2 scFv-TanCAR.

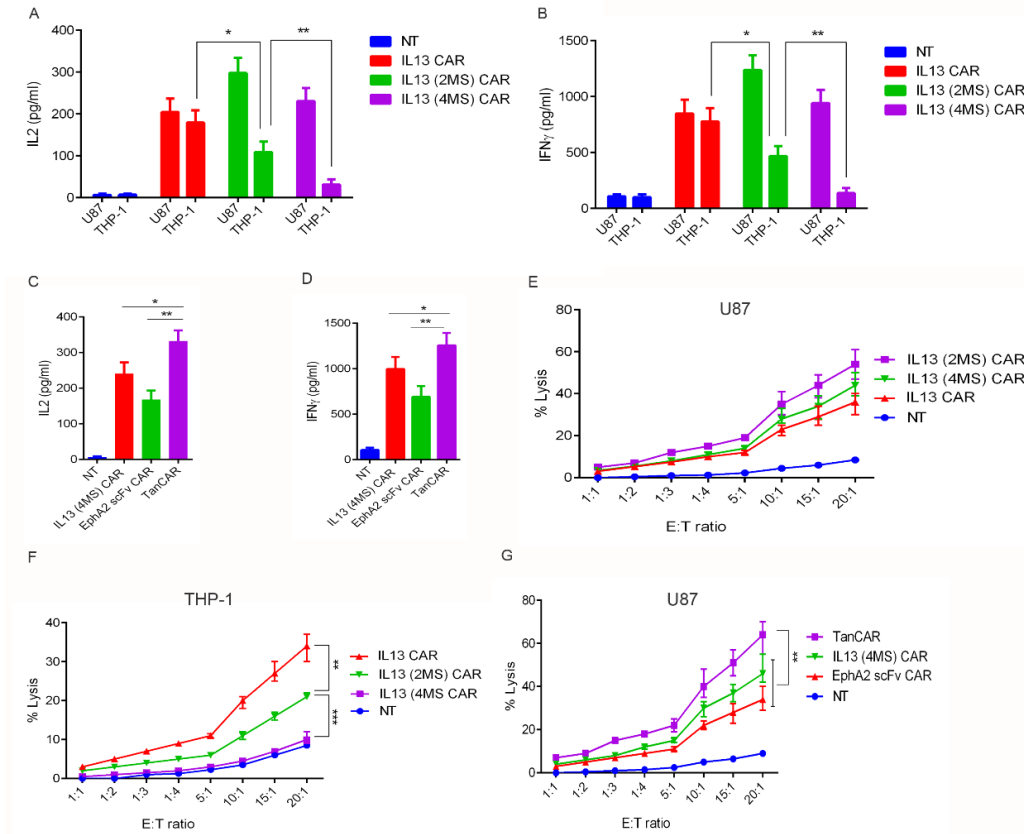

**Figure S6. Functional characterization of the novel bispecific IL13 (4MS)-EphA2 scFv-TanCAR in human primary CD8<sup>+</sup> T cells.** (A) The detection of IL2 levels in the supernatants from different groups of CD8<sup>+</sup> CAR-T cells co-cultured with U87 cells or THP-1 cells. (B) The detection of IFN $\gamma$  levels in the supernatants from different groups of CD8<sup>+</sup> CAR-T cells co-cultured with U87 cells or THP-1 cells. (C) The detection of IL2 levels in the supernatants from different groups of CD8<sup>+</sup> CAR-T cells co-cultured with U87 cells. (D) The detection of IFN $\gamma$  levels in the supernatants from different groups of CD8<sup>+</sup> CAR-T cells co-cultured with U87 cells. (E) The measurement of the cytotoxic activity of different groups of CD8<sup>+</sup> CAR-T cells for U87 cells by LDH level assay. (F) The measurement of the cytotoxic activity of different groups of CD8<sup>+</sup> CAR-T cells for THP-1 cells by LDH level assay (G) The measurement of the cytotoxic activity of different groups of CD8<sup>+</sup> CAR-T cells for U87 cells by LDH level assay. Statistically significant differences are indicated: \*P<0.05; \*\*P<0.01. TanCAR stands for IL13 (4MS)-EphA2 scFv-TanCAR.

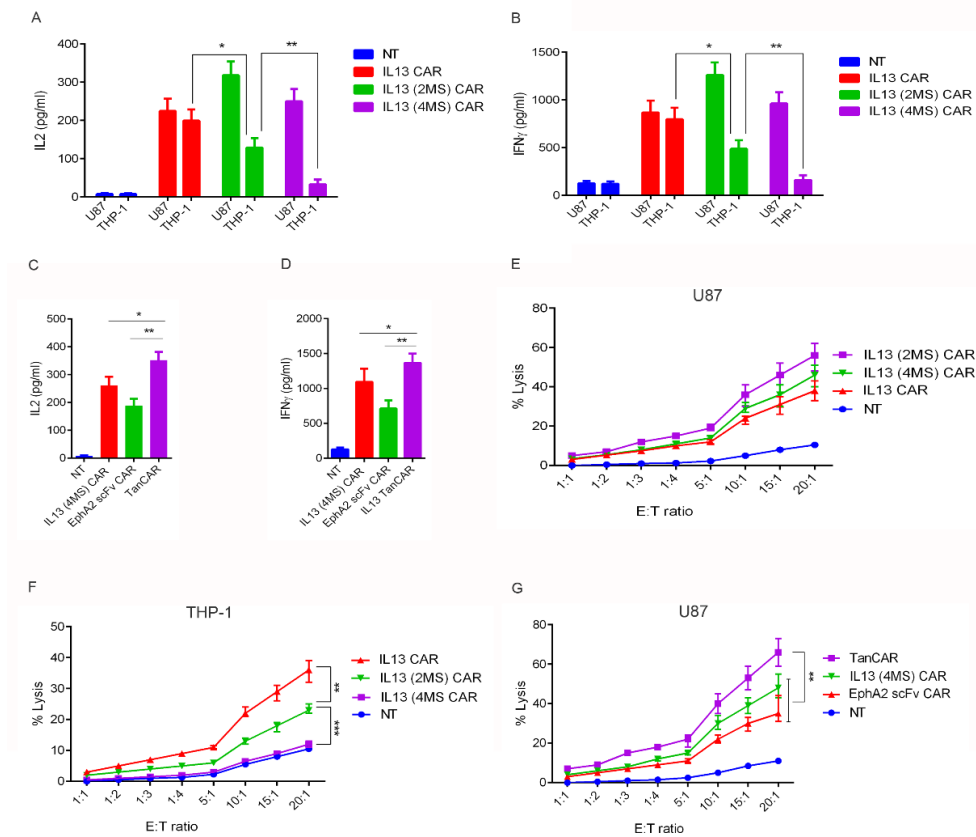

**Figure S7. Functional characterization of the novel bispecific IL13 (4MS)-EphA2 scFv-TanCAR in human primary CD8<sup>+</sup> T cells.** (A) The detection of IL2 levels in the supernatants from different groups of CD8<sup>+</sup> CAR-T cells co-cultured with U87 cells or THP-1 cells. (B) The detection of IFN $\gamma$  levels in the supernatants from different groups of CD8<sup>+</sup> CAR-T cells co-cultured with U87 cells or THP-1 cells. (C) The detection of IL2 levels in the supernatants from different groups of CD8<sup>+</sup> CAR-T cells co-cultured with U87 cells. (D) The detection of IFN $\gamma$  levels in the supernatants from different groups of CD8<sup>+</sup> CAR-T cells co-cultured with U87 cells. (E) The measurement of the cytotoxic activity of different groups of CD8<sup>+</sup> CAR-T cells for U87 cells by LDH level assay. (F) The measurement of the cytotoxic activity of different groups of CD8<sup>+</sup> CAR-T cells for THP-1 cells by LDH level assay (G) The measurement of the cytotoxic activity of different groups of CD8<sup>+</sup> CAR-T cells for U87 cells by LDH level assay. Statistically significant differences are indicated: \*P<0.05; \*\*P<0.01. TanCAR stands for IL13 (4MS)-EphA2 scFv-TanCAR.

**Table S1. The primers used for generating IL13 mutants**

|                        |                                                  |
|------------------------|--------------------------------------------------|
| IL13 SfuI Forward      | ATTCGAATCCCCAGGCCCTGTGCCTCC                      |
| IL13 NheI reverse      | AGCTAGCGTTGAACTGTCCCTCGCGAA                      |
| IL13 E13K Forward      | ccctctacagccctcaggAgactcattgaggagctggtc          |
| IL13 E13K reverse      | gaccagctcctcaatgagtcTcctgagggctgtagagg           |
| IL13 R109K forward     | catttaaagaaacttttAAAgagggacagttcaactga           |
| IL13 R109K reverse     | tcagttgaactgtccctcTTTaaaaagtttctttaaag           |
| IL13 R66D.S69D Forward | gccatcgagaagaccagGACatgctgGACggattctgcccgcacaag  |
| IL13 R66D.S69DReverse  | cttgtgcgggcagaatccGTCcagcatGTCctgggtcttctcgatggc |

**Table S2. The primers used for RT-qPCR analysis**

| Primers                  | Primer Sequence (5'-3') |
|--------------------------|-------------------------|
| IL13R $\alpha$ 1 Forward | TGTGCAATGGGAGAATCCACA   |
| IL13R $\alpha$ 1 Reverse | TGCGACGATGACTGGAACAA    |
| IL13R $\alpha$ 2 Forward | ACCTTTGCCGCCAGTCTATC    |
| IL13R $\alpha$ 2 Reverse | GGTCTTCACCTTCCCAGCAT    |
| EphA2 Forward            | TGGCTCACACACCCGTATG     |
| EphA2 Reverse            | GTCGCCAGACATCACGTTG     |
| GAPDH Forward            | TGGTGAAGACGCCAGTGGA     |
| GAPDH Reverse            | GCACCGTCAAGGCTGAGAAC    |
